# Supplementary material
Source: publisher figshare collection journal article supplement (https://gsapubs.figshare.com/ndownloader/files/25774232)
Supplement: Supplementary file 1 [file 25774232]

## Sheet: G48276
Buff, L., et al., 2021, “Missing links” for the long-lived Macdonald and Arago hotspots, South Pacific Ocean: Geology, v. 49, https://doi.org/10.1130/G48276.1

## Sheet: Table S1
Table S1. Radiogenic isotopic compositions for whole rocks, glass, and clinopyroxene separates from non-Samoan "interloper" seamounts in the Samoan region.1
Sample ID	Volcano name	Material analyzed	Latitude	Longitude	87Sr/86Sr	87Sr/86Sr initial8	2SE	143Nd/144Nd	143Nd/144Nd initial8	2SE	176Hf/177Hf	176Hf/177Hf initial8	2SE	206Pb/204Pb	206Pb/204Pb initial8	2SE	207Pb/204Pb	207Pb/204Pb initial8	2SE	208Pb/204Pb	208Pb/204Pb initial8	2SE
EX1702-D7-2 2	Moki smt.	cpx	-11.1682	-169.892	0.703037	0.703037	5.492e-06	0.512908	0.51286	4.6e-06	0.282922	0.282919	2.63929e-06	20.2209	19.998	0.00157611	15.6205	15.61	0.00120992	40.0478	39.669	0.00310608
EX1702-D7-2 rep 3	Moki smt.	cpx	-11.1682	-169.892	0.703034		4.54833e-06	0.512911		3.52056e-06
EX1702-D11-1 3	Smt D (Dino)	whole rock	-15.7331	-167.265	0.702872		8.67206e-06	0.512989		4.84141e-06				19.6917		0.00289998	15.6201		0.00251341	39.227		0.00586804
EX1702-D11-1 rep 4	Smt D (Dino)	whole rock	-15.7331	-167.265	0.702795		3.17847e-06	0.512985		3.97548e-06				19.705		0.0077947	15.6162		0.00690542	39.3336		0.0197747
EX1702-D3-2 4	Rose atoll	glass	-14.5377	-168.08	0.704014		3.14519e-06	0.512817		3.0108e-06				19.2401		0.000507723	15.6203		0.000454714	39.0252		0.00169314
AVON2/3-D66-1 3	Rose atoll	whole rock	-14.6433	-168.196	0.704085	0.704033	5.8921e-06	0.512798	0.512772	2.82095e-06				19.1025	19.049	0.00584176	15.598	15.595	0.00474158	38.9144	38.836	0.0106509
AVON2/3-D66-1 5	Rose atoll	whole rock	-14.6433	-168.196	0.704137			0.512796						19.1391			15.6216			38.9751
AVON2/3-D65-18 5	Rose atoll	whole rock	-14.489	-168.261	0.703923	0.703774		0.512846	0.512821					19.3182	19.295		15.6072	15.609		39.1615	39.06
EX1702-D12-5 2	Malulu smt	cpx	-14.4688	-168.639	0.703121		4.79672e-06	0.512979		3.4e-06	0.283051		3.63291e-06	19.7237		0.000713589	15.5812		0.000683149	39.4479		0.00178719
EX1702-D12-5 rep 4	Malulu smt	cpx	-14.4688	-168.639	0.703101		2.51539e-06	0.512982		2.18082e-06				19.7483		0.00585436	15.5877		0.00555461	39.4271		0.0162367
AVON2/3-D67-11 3	Malulu smt	whole rock	-14.4988	-168.663	0.703096		6.27482e-06	0.512982		2.56966e-06
AVON2/3-D67-11 rep1 3	Malulu smt	whole rock	-14.4988	-168.663	0.7031		6.66074e-06	0.512982		2.50537e-06				20.9563		0.00237107	15.6535		0.00173298	40.9142		0.00484808
AVON2/3-D67-11 rep2 3	Malulu smt	whole rock	-14.4988	-168.663	0.703108		5.76785e-06	0.51298		2.64039e-06
AVON2/3-D67-11 rep3 3	Malulu smt	whole rock	-14.4988	-168.663	0.703102		6.9652e-06	0.512981		3.29068e-06
AVON2/3-D67-11 5	Malulu smt	whole rock	-14.4988	-168.663	0.703108			0.512765 7						20.9609			15.6587			40.7096
ALIA-DR129-05 6	Papatua smt	whole rock	-14.9705	-170.59	0.703009			0.512976						20.0614			15.6561			39.6569
BCR-2 2		powder			0.70501		4.43741e-06	0.512623		1e-05	0.282873		3.40279e-06	18.7561		0.0026187	15.621		0.00322132	38.7311		0.00351003
BCR-2 3		powder			0.705007		6.11431e-06	0.512621		2.28701e-06
BCR-2 3		powder			0.705003		5.51596e-06	0.51262		2.47307e-06				18.7543		0.000415673	15.6188		0.000400264	38.7162		0.00130865
BCR-2 3		powder			0.705006		6e-06	0.512625		3.02799e-06				18.7415		0.000369166	15.6093		0.000393425	38.6795		0.0013406
BCR-2 published (Weis et al. 2006, 2007) 1		powder			0.705005		1e-05	0.512621		1.2e-05	0.28287		8e-06	18.7533		0.0195	15.6262		0.004	38.7282		0.0405
AGV-2 4		powder			0.703981		4.06858e-06	0.512776		2.32242e-06				18.8704		0.000951323	15.6215		0.000939385	38.5527		0.00253262
AGV-2 published (Weis et al. 2006, 2007) 1		powder			0.703973		9e-06	0.512775		1e-05				18.8692		0.0063	15.6186		0.0071	38.5488		0.0135
1. All data in the table are reported relative to the following international standard values: Nd isotopes are corrected to JNdi value of 0.512099 (Garcon et al., 2018), Sr isotopic data to an NBS 987 value of 0.710240, Pb isotopic compositions are
corrected to the NIST 981 values of Eisele et al. (2003) (16.9409, 15.4976, 36.7262), and Hf isotopic data are corrected to the JMC-475 of 0.282160. For the data from Weis et al (2006, 2007), Nd isotopic compositions are renormalized to a JNdi
equivalent value of 0.512099 using Tanaka et al.‘s (2000) La Jolla to JNdi-1 conversion, and their Pb isotopic data are renormalized to the NBS981 values from Eisele et al. (2003), and Hf isotopic data reflect only those samples processed with
teflon columns because samples processed in quartz columns may have compromised Hf. Italicized data are previously published from Jackson et al (2010), and represent Sr, Nd, and unspiked Pb run by TIMS at WHOI (and are renormalized to the
international standard values provided above). For the Weis et al (2006, 2007 data), errors are reported as 2SD of multiple analyses (all other errors in the table are 2SE), except for the BCR analysis at University of South Carolina (which is the
2SD of 5 analyses of the same BCR-2).
2. All leaching, wet chemistry (sample dissolutions and chemical separations) and mass spectrometry (all using MC-ICP-MS) for Sr, Nd, Pb and Hf isotopes completed at U. South Carolina.
3. Leaching and wet chemistry (sample dissolutions and chemical separations) for Sr, Nd, and Pb completed at UCSB. Sr and Nd mass spectrometry completed on UCSB TIMS, and Pb mass spectrometry (if any) completed on U. South Carolina MC-ICP-MS.
4. Leaching and wet chemistry (sample dissolutions and chemical separations) for Sr, Nd, and Pb completed at UCSB. Sr and Nd mass spectrometry completed on UCSB TIMS, and Pb mass spectrometry (if any) completed on WHOI MC-ICP-MS.
5. Leaching and wet chemistry (sample dissolutions and chemical separations) and mass spectrometry for Sr, Nd, and Pb completed on WHOI TIMS (data published in Jackson et al., 2010).
6. Leaching and wet chemistry (sample dissolutions and chemical separations) and mass spectrometry for Sr, Nd, and Pb completed on WHOI MC-ICP-MS (data published in Jackson et al., 2010).
7. This result is superceded by new analyses of this sample made at UCSB (also presented in this table).
8. AVON2/3-D66-1, and the other Rose sample (AVON2/3-D65-18), are age corrected to 24.81 Ma. EX1702-D7-2 is age corrected to 44.53 Ma.

## Sheet: Table S2
Table S2. Major and trace element concentrations lavas published in this study together with prior analyses of related seamounts.
Seamount or atoll	Moki smt. 1	Moki smt. 2	Papatua smt. 3	Malulu smt. 3	Malulu smt. 2	Smt. D (Dino) 1	Rose atoll 3	Rose atoll 3	Rose atoll 1	Rose atoll 4	Ref material 1	Ref material 1	Ref material 2	Ref material 2	Ref material 4	Ref material 4
Sample ID	EX1702-D7-2	EX1702-D7-2	ALIA-DR129-05	AVON2/3-67-11	EX1702-12-5	EX1702-D11-1	AVON2/3-65-18	AVON2/3-66-1	EX1702-D3-2	EX1702-D3-2	BCR-2	BCR-2	BHVO-1	BHVO-1	ALV-519-4-1	ALV-519-4-1
Sample Info	whole rock	cpx	whole rock	whole rock	cpx	whole rock	whole rock	whole rock	whole rock	glass	(this study)	(publ)	(this study)	(publ)	(this study)	(publ)
XRF or ICP-MS Solution Majors
SiO2	36.2966		38.653	41.7709		45.0009	45.9681	46.1791	46.4335	51.5663	54.2974	54.9334		50.1724	48.9826	48.94
TiO2	4.73606		3.43364	3.19607		1.81982	3.10687	1.90196	2.44037	2.42637	2.28826	2.30415		2.76306	0.727559	0.77
Al2O3	12.3374		15.6672	11.6302		15.516	13.2595	8.88982	13.8475	14.6063	13.5399	13.713		13.7951	16.4358	16.53
FeO*	11.3656		10.8396	13.5573		8.88439	11.4525	11.5258	11.8293	9.54431	12.4654	12.6072		11.1732	8.90875	9.03
MnO	0.125415		0.183798	0.224005		0.0614951	0.174993	0.178996	0.154376	0.144902	0.200365	0.199998		0.170197	0.170478
MgO	6.59007		3.32836	7.09015		2.43109	8.45965	19.1796	6.43042	6.127	3.59507	3.66121		7.2684	9.70916	9.41
CaO	15.1509		10.6631	15.6403		12.595	11.2195	9.16982	11.3007	10.1609	7.14666	7.23696		11.5178	12.4791	12.58
Na2O	1.1654		3.13862	1.95004		3.01453	2.02992	1.46997	2.88709	3.05291	3.17504	3.17393		2.33077	2.10183	2.07
K2O	0.827365		1.95983	1.11002		2.42373	1.49994	0.579988	0.540962	0.909082	1.79832	1.80466		0.529637	0.0813097	0.1
P2O5	2.58561		3.26279	1.50103		0.594004	0.268989	0.244995	0.892863	0.386554	0.351965	0.36551		0.27943	0.0656332	0.09
Total (majors only)	91.1804		91.13	97.67		92.427	97.44	99.32	96.7711	98.9246	98.8583				99.6622	99.52
LOI	8.11393		8.87417	2.332		7.26631	2.556	0.678	2.77625
Sum of Majors and LOI	99.2943		100.004	100.002		99.6934	99.996	99.998	99.5474
XRF or ICP-MS Solution or Laser Traces
Ni	86.05		44.4	120		28.379	148	692	144.406	83.6112	12.45	13			188.775	178
Cr	456.35	1921.96	3.3	608	1429.83	34.3118	437	1116	726.409	159.718	11.175	16	291.838	287.6	412.679	526
V	365.55	208.257	223.5	319	139.245	195.709	278	182	240.089	229.84	410.375	418	321.261	313.8	243.66	210
Ga	17.5	7.51048	16.8	16	11.0662	17.157	17	18	21.883	23.3233	21.525	22	20.9209	21.32	14.0738
Cu	91.6	1.4507	53.6	148	1.87126	117.155	78	54	67.8855	56.8025	18.275	20	130.175	137.2	107.79	98
Zn	218.35	14.954	174.2	144	24.6111	98.9032	151	116	158.299	144.306	130.025	130	106.102	105.1	82.8575
Sc	36.3					43.183			26.3513		33.05	0.5049
Ba	220					90.4952			154.576		686.65	683.9
Nb	82.35					12.9677			23.871		12.6	12.44
Rb	18.424					31.573			9.312		46.795	46.02
Sr	279.3					266.28			462.354		338.225	337.4
Zr	266.305					127.915			186.802		178.486	186.5
Y	59.05					31.6208			31.3633		35.725	1.313
La	75					13.168			23.4062		24.8	25.08
Ce	112.65					26.4832			50.3658		54.85	53.12
Nd	55.35					18.704			31.7592		28.65	28.26
ICP-MS Solution or Laser Traces
Li		0.47			1.54					8.21352			4.76	4.68	4.22375	4.2
Mo		0.0269638			0.109889								1.07222	1.061
Sn		0.0608686			0.201228								1.78821	2.09
W		bdl			0.0248491								0.198671	0.212
Co		24.7927			21.5573					37.2846			43.565	44.9	51.1775	48.7
Cs	0.523621	bdl	1.54382	0.961259	0.00126447	0.757258	0.380664	0.307985	0.203884	0.593874	1.14471	1.16	0.087664	0.1032	0.02235	0.02
Rb	17.3953	bdl	37.1715	28.6797	0.151853	30.0964	21.2125	12.4061	7.18164	25.5187	46.5285	46.02	8.23731	9.52	2.12575	2.01
Ba	219.166	0.719658	291.722	257.436	2.93403	90.6717	65.9159	102.955	151.104	202.396	682.78	683.9	128.002	134.4	24.4112	24.3
Th	6.24055	0.0514067	5.73976	6.39672	0.337246	1.13673	3.57653	1.82036	3.05722	2.8751	6.22713	5.828	1.22246	1.225	0.260875	0.28
U	2.88522	0.0082279	1.89008	1.73496	0.0448627	0.415544	0.291752	0.414984	0.786481	0.912641	1.71314	1.683	0.40885	0.4182	0.09215	0.09
Nb	84.6834	0.866874	60.6927	77.8023	3.01805	13.1262	33.2359	19.1754	24.4617	27.3147	11.6089	12.44	20.1114	18.53	4.01875	4.49
Ta	5.51115	0.110148	3.85004	4.50939	0.431452	0.900373	2.34609	1.32455	1.66583	1.66429	0.780777	0.785	1.17058	1.174	0.235375	0.27
La	74.3018	3.02321	88.0706	76.056	9.31862	12.8768	26.197	15.7755	24.5608	22.212	25.7407	25.08	15.3895	15.44	2.67925	2.81
Ce	114.365	10.2006	101.001	145.854	29.725	26.5704	67.9804	35.7566	49.5592	50.8067	53.5118	53.12	37.532	38.08	6.75125	6.9
Pb	2.39075	0.0172793	3.58749	3.39824	0.109633	0.886032	2.94482	1.91461	2.40113	2.69401	10.4459	10.59	2.01631	2.037	0.206875	0.27
Pr	14.3406	1.69325	15.1234	18.1045	5.02484	3.90533	8.16074	4.49637	6.54422	6.18929	6.96726	6.827	4.93456	5.419	0.940875	1.02
Nd	56.297	9.15745	61.3956	77.6762	27.9232	17.617	37.0226	20.8123	28.9434	28.2475	29.2317	28.26	24.4003	24.78	4.8625	5.17
Sr	290.21	55.1668	821.652	1065.66	164.474	271.533	144.727	244.079	477.186	457.665	346.367	337.4	389.987	399.2	64.31	71
Zr	280.282	52.6115	271.06	277.526	214.065	129.859	208.437	131.705	194.397	194.865	183.781	186.5	170.698	174.6	34.4612	39.9
Hf	7.02988	2.46915	6.21034	5.9741	6.94856	3.28799	5.70976	3.46458	5.05206	4.49499	5.02983	4.972	4.26452	4.44	0.947	1.11
Sm	10.7369	2.51043	12.2436	17.6465	7.42675	4.68736	9.50595	5.47077	7.28507	6.82186	6.93703	6.547	5.90763	6.165	1.62325	1.66
Eu	3.37731	0.826852	3.9332	5.67882	2.37383	1.75898	3.05967	1.7955	2.48323	2.19069	2.13102	1.989	2.03168	2.053	0.62525	0.65
Gd	9.8266	2.47866	12.5139	15.4007	6.79064	5.69505	8.69323	4.99149	7.19066	6.35549	7.10959	6.811	6.19513	6.285	2.2755	2.58
Tb	1.39229	0.377681	1.8894	2.111	0.906522	0.950936	1.3054	0.751235	1.08627	0.85757	1.17898	1.077	0.935049	0.9455	0.417	0.48
Dy	8.04636	1.77059	11.7185	10.7876	4.14442	5.9554	6.92871	4.16317	6.14605	5.14492	6.98931	6.424	4.90339	5.272	3.23625	3.44
Ho	1.58232	0.313063	2.70703	1.83258	0.654467	1.25802	1.19614	0.735199	1.11639	0.899989	1.46328	1.313	0.94115	0.9839	0.710375	0.79
Y	60.9484	8.03798	129.542	53.991	18.0147	32.1472	31.6059	18.5114	31.5314	22.8197	36.1989	36.07	26.2218	26.23	18.6375	22.3
Er	3.9585	0.721712	7.66415	4.06301	1.37422	3.40101	2.80931	1.71256	2.71738	2.31125	3.8127	3.67	2.44056	2.501	2.21225	2.33
Tm	0.533632	0.0911891	1.09157	0.504574	0.164708	0.473105	0.346948	0.22147	0.370086	0.297185	0.547735	0.5341	0.338548	0.3289	0.33175
Yb	3.21924	0.508473	6.88902	2.70693	0.897422	2.8835	1.90154	1.2599	2.10265	1.79278	3.34312	3.392	1.93479	1.987	2.30075	2.43
Lu	0.506981	0.0703338	1.18888	0.387809	0.119429	0.455675	0.282439	0.181538	0.312465	0.238269	0.50667	0.5049	0.274485	0.2775	0.341625	0.39
Sc	35.9165	80.7932	14.5558	28.5556	79.8021	44.6242	29.026	24.883	26.4121	23.8517	33.3694	33.53	31.8559	31.42	42.5688	43
1. For whole rock samples EX1702-D7-2, EX1702-D11-1, and EX1702-D3-2, major elements and a subset of trace elements analyzed by XRF, and some of these trace elements and an additional set of trace elements were analyzed by solution ICP-MS. A BCR-2 reference
material was analyzed as an unknown together with the samples in this study and previously published data on the BCR-2 are reported in Jochum et al. (2016) and shown in this table for reference.
2. Trace elements and a subset of major elements on clinopyroxene separates (EX1702-D7-2 and EX1702-D12-5) were run by solution ICP-MS at the University of South Carolina. Published major and trace element concentrations for this reference materials are from Jochum et al. (2016)
and are shown in this table for reference; the major element concentrations from Jochum et al. (2016) are here normalized to 100% total with all Fe reported as FeO.
3. Italicized data were previously published in Jackson et al. (2010), and include two lavas from Rose atoll, 1 lava from Papatua seamount, and 1 lava from Malulu seamount. LOI's (Loss On Ignition) are estimated for these 4 lavas after Jackson et al. (2010).
4. The major element composition of the EX1702-D3-2 glass is the average of three different spot analyses by electron probe. The major element composition of the ALV-519-4-1 reference glass is the average of 22 different spot analyses analyzed during the same analytical session as
EX1702-D3-2, and the data are shown together with published of ALV-519-2 values from Melson et al (2002). The trace element composition of the EX1702-D3-2 glass is the average of four different spot analyses by LA-ICP-MS. The trace element composition of the ALV-519-4-1
reference glass is the average of 8 different spot analyses during the same analytical session as EX1702-D3-2, and the data are shown together with published data on ALV-519-4-1 from Gale et al. (2013) and compiled in Jackson et al. (2015).

## Sheet: Table S3
	STACK > AVON03-66-1 (N=2) > Clinopyroxene > KONRAD (19-INT-03) SAMOA > ROSE SEAMOUNT 19-OSU-02 (2A30-19) > Incremental Heating > Daniel Heaton
	Information on Analysis and Constants Used in Calculations					Results		40(a)/36(a)	± 2s	40(r)/39(k)	± 2s	Age	± 2s	MSWD	39Ar(k)	K/Ca	± 2s
												(Ma)			(%,n)
	Project = KONRAD (19-INT-03)					Age Plateau				8.71544	0.360878	24.8053	1.02451	0.362164	100	0.010126	0.00270438
	Stack = AVON03-66-1 (N=2)										0.0414068		0.0413021	0.999943	42
	Material = Clinopyroxene					Full External Error							1.64349	1.44173	2σ Confidence Limit
	Location = Rose Seamount					Analytical Error							1.02018	1	Error Magnification
	Region = Samoa
	Analyst = Daniel Heaton					Total Fusion Age				8.77344	0.412119	24.9693	1.16878		42	0.101806	0.00517586
	Irradiation = 19-OSU-02 (2A30-19)										0.0469735		0.0468085
	Position = X: 0 | Y: 0 | Z/H: 46.06823 mm					Full External Error							1.74336
	FCT-NM Age = 28.201 ± 0.023 Ma					Analytical Error							1.16493
	FCT-NM Reference = Kuiper et al (2008)
	FCT-NM 40Ar/39Ar Ratio = 9.91773 ± 0.01894					Normal Isochron No Convergence		272.442	23.6047	9.74873	0.49215	27.7241	1.39303	1.4951	100
	FCT-NM J-value = 0.00156543 ± 0.00000299								0.0866412		0.0504835		0.0502463	0.0227654	42
	Air Shot 40Ar/36Ar = 298.4240 ± 0.4357					Full External Error							2.00045	1.44721	2σ Confidence Limit
	Air Shot MDF = 1.00011408 ± 0.00044892 (LIN)					Analytical Error							1.38906	1.22274	Error Magnification
	Experiment Type = Incremental Heating
	Extraction Method = Bulk Laser Heating					Inverse Isochron Overestimated Error		314.846	20.4696	8.51214	0.483358	24.2305	1.36994	0.291332	100
	Heating = 120 sec								0.0650146		0.0567845		0.0565378	0.999997	42
	Isolation = 6.12 min					Full External Error							1.85816	1.44721	2σ Confidence Limit
	Instrument = ARGUS-VI-G					Analytical Error							1.36685	1	Error Magnification
	Preferred Age = Plateau Age												0.966812		Spreading Factor
	Age Classification = Crystallization Age
	Lithology = Basalt
	Lat-Lon = -14.6433, -168.1956
	Age Equations = Min et al. (2000)
	Negative Intensities = Allowed
	Collector Calibrations = 40Ar 39Ar 38Ar 37Ar 36Ar
	Decay 40K = 5.463 ± 0.107 E-10 1/a
	Decay 39Ar = 2.940 ± 0.016 E-07 1/h
	Decay 37Ar = 8.230 ± 0.012 E-04 1/h
	Decay 36Cl = 2.257 ± 0.015 E-06 1/a
	Decay 40K(EC,β⁺) = 0.580 ± 0.014 E-10 1/a
	Decay 40K(β⁻) = 4.884 ± 0.099 E-10 1/a
	Atmospheric 40/36(a) = 298.56 ± 0.31
	Atmospheric 38/36(a) = 0.1885 ± 0.0003
	Production 39/37(ca) = 0.0006425 ± 0.0000059
	Production 38/37(ca) = 0.0001800 ± 0.0000173
	Production 36/37(ca) = 0.0002703 ± 0.0000005
	Production 40/39(k) = 0.000607 ± 0.000059
	Production 38/39(k) = 0.012077 ± 0.000011
	Production 36/38(cl) = 262.80 ± 1.71
	Scaling Ratio K/Ca = 0.430
	Abundance Ratio 40K/K = 1.1700 ± 0.0100 E-04
	Atomic Weight K = 39.0983 ± 0.0001 g
	Very long and clean plateaus with atmospheric intercepts.

## Sheet: Table S4
	EXP#20G08654 > EX1702-D7-2 > Clinopyroxene > KONRAD (19-INT-03) SAMOA > MOKI SEAMOUNT 19-OSU-02 (2A33-19) > Incremental Heating > Daniel Heaton
	Information on Analysis and Constants Used in Calculations					Results		40(a)/36(a)	± 2s	40(r)/39(k)	± 2s	Age	± 2s	MSWD	39Ar(k)	K/Ca	± 2s
												(Ma)			(%,n)
	Project = KONRAD (19-INT-03)					Age Plateau				16.5071	3.29268	46.3595	9.13526	1.44997	89.3523	0.00211271	0.000559877
	Sample = EX1702-D7-2										0.199471		0.197053	0.114542	16
	Material = Clinopyroxene					Full External Error							9.44392	1.7303	2σ Confidence Limit
	Location = Moki Seamount					Analytical Error							9.13124	1.20415	Error Magnification
	Region = Samoa
	Analyst = Daniel Heaton					Total Fusion Age				23.8365	3.05913	66.5733	8.39931		20	0.0116156	0.00166972
	Irradiation = 19-OSU-02 (2A33-19)										0.128338		0.126166
	Position = X: 0 | Y: 0 | Z/H: 50.4228 mm					Full External Error							9.07246
	FCT-NM Age = 28.201 ± 0.023 Ma					Analytical Error							8.39039
	FCT-NM Reference = Kuiper et al (2008)
	FCT-NM 40Ar/39Ar Ratio = 9.99156 ± 0.02958					Normal Isochron		317.652	11.2816	12.5901	3.495	35.4648	9.75242	0.945093	89.3523
	FCT-NM J-value = 0.00155386 ± 0.00000460								0.0355155		0.277599		0.274989	0.508397	16
	Air Shot 40Ar/36Ar = 298.4860 ± 0.4149					Full External Error							9.92348	1.75593	2σ Confidence Limit
	Air Shot MDF = 1.00006206 ± 0.00043467 (LIN)					Analytical Error							9.7502	1	Error Magnification
	Experiment Type = Incremental Heating
	Extraction Method = Bulk Laser Heating					Inverse Isochron		312.98	12.1899	15.849	3.61917	44.5336	10.0501	1.12034	89.3523
	Heating = 120 sec								0.038948		0.228354		0.225673	0.333005	16
	Isolation = 6.12 min					Full External Error							10.3101	1.75593	2σ Confidence Limit
	Instrument = ARGUS-VI-G					Analytical Error							10.0467	1.05846	Error Magnification
	Preferred Age = Plateau Age												0.755291		Spreading Factor
	Age Classification = Crystallization Age
	Lithology = Basalt
	Lat-Lon = -11.1682, -169.8922
	Age Equations = Min et al. (2000)
	Negative Intensities = Allowed
	Collector Calibrations = 36Ar
	Decay 40K = 5.463 ± 0.107 E-10 1/a
	Decay 39Ar = 2.940 ± 0.016 E-07 1/h
	Decay 37Ar = 8.230 ± 0.012 E-04 1/h
	Decay 36Cl = 2.257 ± 0.015 E-06 1/a
	Decay 40K(EC,β⁺) = 0.580 ± 0.014 E-10 1/a
	Decay 40K(β⁻) = 4.884 ± 0.099 E-10 1/a
	Atmospheric 40/36(a) = 298.56 ± 0.31
	Atmospheric 38/36(a) = 0.1885 ± 0.0003
	Production 39/37(ca) = 0.0006425 ± 0.0000059
	Production 38/37(ca) = 0.0001800 ± 0.0000173
	Production 36/37(ca) = 0.0002703 ± 0.0000005
	Production 40/39(k) = 0.000607 ± 0.000059
	Production 38/39(k) = 0.012077 ± 0.000011
	Production 36/38(cl) = 262.80 ± 1.71
	Scaling Ratio K/Ca = 0.430
	Abundance Ratio 40K/K = 1.1700 ± 0.0100 E-04
	Atomic Weight K = 39.0983 ± 0.0001 g
	Large individual heating step uncertainties are due to low concentrations of radiogenic 40 as well as 39; 37.
